# Supplementary material for: Exposure to outdoor air pollution and its human health outcomes: A scoping review
Source: PubMed Central journal article supplement (PMC6522200; doi:10.1371/journal.pone.0216550), 2019-05-16
Supplement: pone.0216550.s001.pdf [file pone.0216550.s001.pdf]

| Database: PubMed, Dates: Inception to May 22th, 2018 |                                                                                                                                                                                                                                                                                                                                                                                                                                                                                                                                                                                                                                                                                                                            |         |
|------------------------------------------------------|----------------------------------------------------------------------------------------------------------------------------------------------------------------------------------------------------------------------------------------------------------------------------------------------------------------------------------------------------------------------------------------------------------------------------------------------------------------------------------------------------------------------------------------------------------------------------------------------------------------------------------------------------------------------------------------------------------------------------|---------|
|                                                      | heart rate variability[MeSH Terms]) OR heart attack[MeSH Terms]) OR cardiopulmonary disease[MeSH Terms]) OR ischemic heart disease[MeSH Terms]) OR blood coagulation[MeSH Terms]) OR deep vein thrombosis[MeSH Terms]) OR stroke[MeSH Terms]) OR morbidity[MeSH Terms]) OR hospital admission[MeSH Terms]) OR outpatient visit[MeSH Terms]) OR emergency room visit[MeSH Terms]) OR mortality[MeSH Terms]) OR DNA methylation change[MeSH Terms]) OR neurobehavioral function[MeSH Terms]) OR Inflammatory disease[MeSH Terms]) OR skin disease[MeSH Terms]) OR abortion[MeSH Terms]) OR Alzheimer's disease[MeSH Terms]) OR disability[MeSH Terms]) OR cognitive function[MeSH Terms]) OR Parkinson's disease[MeSH Terms] |         |
| #3                                                   | Search (outdoor[Text Word]) AND air pollution[Text Word]                                                                                                                                                                                                                                                                                                                                                                                                                                                                                                                                                                                                                                                                   | 3,132   |
|                                                      | #1 AND #2 AND #3                                                                                                                                                                                                                                                                                                                                                                                                                                                                                                                                                                                                                                                                                                           | 194     |
| #4                                                   | meta analysis[Title/Abstract]                                                                                                                                                                                                                                                                                                                                                                                                                                                                                                                                                                                                                                                                                              | 109,835 |
|                                                      | #3 AND #4                                                                                                                                                                                                                                                                                                                                                                                                                                                                                                                                                                                                                                                                                                                  | 44      |
| #5                                                   | systematic review[Title/Abstract]                                                                                                                                                                                                                                                                                                                                                                                                                                                                                                                                                                                                                                                                                          | 120,881 |
|                                                      | #3 AND #5                                                                                                                                                                                                                                                                                                                                                                                                                                                                                                                                                                                                                                                                                                                  | 39      |
| deduplication: 257                                   |                                                                                                                                                                                                                                                                                                                                                                                                                                                                                                                                                                                                                                                                                                                            |         |

Search strategies for databases Scopus.

| Database: Scopus, Dates: Inception to May 30th, 2018 |                                                                                                                                                                                                                                                                                                                                                                                                                                                                                                                                                                                                                                           |           |
|------------------------------------------------------|-------------------------------------------------------------------------------------------------------------------------------------------------------------------------------------------------------------------------------------------------------------------------------------------------------------------------------------------------------------------------------------------------------------------------------------------------------------------------------------------------------------------------------------------------------------------------------------------------------------------------------------------|-----------|
| #                                                    | Searches                                                                                                                                                                                                                                                                                                                                                                                                                                                                                                                                                                                                                                  | Results   |
| #1                                                   | TITLE-ABS-KEY ( "Ozone" ) OR TITLE-ABS-KEY ( "sulfur dioxide" ) OR TITLE-ABS-KEY ( "carbon monoxide" ) OR TITLE-ABS-KEY ( "nitrogen dioxide" ) OR TITLE-ABS-KEY ( PM <sub>2.5</sub> ) OR TITLE-ABS-KEY ( PM <sub>10</sub> ) OR TITLE-ABS-KEY ( total AND suspended AND particle ) OR TITLE-ABS-KEY ( suspended AND particulate AND matter ) OR TITLE-ABS-KEY ( toxic AND air AND pollutant ) OR TITLE-ABS-KEY ( "volatile organic pollutant" ) OR TITLE-ABS-KEY ( "nitrogen oxide" )                                                                                                                                                      | 324,714   |
| #2                                                   | TITLE-ABS-KEY ( "asthma" ) OR TITLE-ABS-KEY ( "lung cancer" ) OR TITLE-ABS-KEY ( "respiratory infection" ) OR TITLE-ABS-KEY ( "respiratory disorder" ) OR TITLE-ABS-KEY ( "diabetes" ) OR TITLE-ABS-KEY ( "chronic obstructive pulmonary disease" ) OR TITLE-ABS-KEY ( "chronic obstructive pulmonary disease" ) OR TITLE-ABS-KEY ( "hypertension" ) OR TITLE-ABS-KEY ( "heart rate variability" ) OR TITLE-ABS-KEY ( "heart attack" ) OR TITLE-ABS-KEY ( "cardiopulmonary disease" ) OR TITLE-ABS-KEY ( "ischemic heart disease" ) OR TITLE-ABS-KEY ( "blood coagulation" ) OR TITLE-ABS-KEY ( "deep vein thrombosis" ) OR TITLE-ABS-KEY | 4,420,836 |

| Database: Scopus, Dates: Inception to May 30th, 2018 |                                                                                                                                                                                                                                                                                                                                                                                                                                                                                                                                                                                                                             |         |
|------------------------------------------------------|-----------------------------------------------------------------------------------------------------------------------------------------------------------------------------------------------------------------------------------------------------------------------------------------------------------------------------------------------------------------------------------------------------------------------------------------------------------------------------------------------------------------------------------------------------------------------------------------------------------------------------|---------|
|                                                      | ( stroke ) OR TITLE-ABS-KEY ( morbidity ) OR TITLE-ABS-KEY ( " hospital admission" ) OR TITLE-ABS-KEY ( "outpatient visit" ) OR TITLE-ABS-KEY ( " emergency room visit" ) OR TITLE-ABS-KEY ( mortality ) OR TITLE-ABS-KEY ( " DNA Methylation Change" ) OR TITLE-ABS-KEY ( "neurobehavioral function" ) OR TITLE-ABS-KEY ( " Inflammatory disease " ) OR TITLE-ABS-KEY ( "skin disease" ) OR TITLE-ABS-KEY ( abortion ) OR TITLE-ABS-KEY ( "Alzheimer's disease" ) OR TITLE-ABS-KEY ( "skin disease" ) OR TITLE-ABS-KEY ( disability ) OR TITLE-ABS-KEY ( "cognitive function" ) OR TITLE-ABS-KEY ( "Parkinson's disease" ) |         |
| #3                                                   | ALL ( outdoor ) AND ALL ( " air pollution" )                                                                                                                                                                                                                                                                                                                                                                                                                                                                                                                                                                                | 30,841  |
|                                                      | #1 AND #2 AND #3                                                                                                                                                                                                                                                                                                                                                                                                                                                                                                                                                                                                            | 3,156   |
| #4                                                   | TITLE-ABS-KEY ( "meta analysis" ) OR TITLE-ABS-KEY ( "systematic review" )                                                                                                                                                                                                                                                                                                                                                                                                                                                                                                                                                  | 326,969 |
|                                                      | #1 AND #2 AND #3 AND #4                                                                                                                                                                                                                                                                                                                                                                                                                                                                                                                                                                                                     | 184     |
| deduplication: 3169                                  |                                                                                                                                                                                                                                                                                                                                                                                                                                                                                                                                                                                                                             |         |

Search strategies for economic discipline.

| Database: Web of Science, Dates: Inception to May 30th, 2018 |                                       |         |
|--------------------------------------------------------------|---------------------------------------|---------|
| #                                                            | Searches                              | Results |
| #1                                                           | TS = ( air +health) AND SO = (econom) | 43      |
| deduplication: 43                                            |                                       |         |

| Database: Scopus, Dates: Inception to May 30th, 2018 |                                                                            |         |
|------------------------------------------------------|----------------------------------------------------------------------------|---------|
| #                                                    | Searches                                                                   | Results |
| #1                                                   | TITLE-ABS-KEY ( air ) AND TITLE-ABS-KEY ( health ) AND SRCTITLE ( econom ) | 398     |
| deduplication: 398                                   |                                                                            |         |
